1  
2  
3  
4  
5  
6  
7  
8  
9  
10  
11  
12  
13  
14  
15  
16  
17  
18  
19  
20  
21  
22  
23

# Culturing the ubiquitous freshwater actinobacterial acI lineage by supplying a biochemical ‘helper’ catalase

Suhyun Kim<sup>1</sup>, Ilnam Kang<sup>1</sup>, Ji-Hui Seo, and Jang-Cheon Cho<sup>2</sup>

Department of Biological Sciences, Inha University, Incheon 22212, Republic of Korea

<sup>1</sup>S.K. and I.K. contributed equally to this work.

<sup>2</sup>To whom correspondence should be addressed. Email: chojc@inha.ac.kr.

Corresponding author: Jang-Cheon Cho

Address: Department of Biological Sciences, Inha University, Inharo 100, Namgu, Incheon 22212, Republic of Korea

Tel: +82-32-860-7711

Email: chojc@inha.ac.kr

Keywords: acI lineage, Freshwater, Bacteria, Catalase, Hydrogen Peroxide, Cultivation

24 **Abstract**

25        Unlike the ocean from which abundant microorganisms with streamlined genomes such as  
26 *Prochlorococcus*, *Pelagibacter*, and *Nitrosopumilus* have been isolated, no stable axenic bacterial cultures are  
27 available for the ubiquitous freshwater actinobacterial acI lineage. The acI lineage is among the most successful  
28 limnic bacterioplankton found on all continents, often representing more than half of all microbial cells in the  
29 lacustrine environment and constituting multiple ecotypes. Dilution-to-extinction culturing followed by whole-  
30 genome amplification recently yielded 20 complete acI genomes from lakes in Asia and Europe. However, stably  
31 growing pure cultures have not been established despite various efforts at cultivation using growth factors  
32 predicted from genome information. Here, we report two pure cultures of the acI lineage successfully maintained  
33 by supplementing the growth media with catalase. Catalase was critical for stabilizing growth by degrading  
34 hydrogen peroxide, irrespective of the genomic presence of the catalase-peroxidase (*katG*) gene, making the acI  
35 strains the first example of the Black Queen hypothesis reported for freshwater bacteria. The two strains,  
36 representing two novel species, displayed differential phenotypes and distinct preferences for reduced sulfurs  
37 and carbohydrates, some of which were difficult to predict based on genomic information. Our results suggest  
38 that culture of previously uncultured freshwater bacteria can be facilitated by a simple catalase-supplement  
39 method and indicate that genome-based metabolic prediction can be complemented by physiological analyses.

40

41 The acI lineage of the phylum *Actinobacteria* is the most abundant and cosmopolitan bacterial group in  
42 most freshwater environments. Since the acI lineage was first suggested to denote an abundant monophyletic  
43 actinobacterial group exclusively found in freshwater environments (1-3), many studies have demonstrated the  
44 ubiquity and prevalence of the acI lineage in diverse freshwater ecosystems on all continents (4-10).

45 Studies employing fluorescence *in situ* hybridization (FISH) and PCR-based 16S rRNA gene sequence  
46 profiling showed that the acI lineage and its subgroups exhibit specific distributions depending on the season,  
47 depth, and habitat characteristics and that there are >10 monophyletic tribes belonging to three sublineages (acI-  
48 A, -B, and -C) (4, 11-13). Ecophysiological studies using FISH combined with microautoradiography (MAR-  
49 FISH) showed that the acI lineage uptakes diverse substrates including leucine, thymidine, glucose, acetate, *N*-  
50 acetylglucosamine, and amino acid mixtures, but the substrate utilization patterns vary depending on the  
51 substrates, habitats, and sublineages (14-17). Shotgun metagenomics of freshwater samples (18, 19) and PCR-  
52 based surveys of enrichment cultures and single-amplified genomes (SAGs) of freshwater origin (20, 21)  
53 suggested that members of the acI lineage have genomes with low G+C content and carry genes for  
54 actinorhodopsin. Studies of SAGs (22, 23) and metagenome-assembled genomes (MAGs) (24) confirmed that  
55 the acI lineage genomes have low G+C content and encode actinorhodopsin genes and further suggested that the  
56 genomes are small-sized and enriched in genes for acquiring and utilizing carbohydrate and N-rich organic  
57 compounds.

58 As genomic data of the acI lineage has accumulated through culture-independent studies, cultivation of the  
59 acI lineage has become increasingly necessary because pure cultures can enable experimental verification of  
60 hypotheses deduced from the genomic data and reveal ecophysiological traits relevant to their survival and niche  
61 partitioning in natural habitats in a definitive manner (25, 26). The first report on cultivation of the acI lineage  
62 was based on a mixed culture obtained from a freshwater lake, but the proportion of acI cells was <6% (27).  
63 Several enrichment cultures containing acI-B strains with higher proportions (up to >50%) were obtained by  
64 dilution culturing from freshwater lakes, and MAGs retrieved from these enrichment cultures suggested that the  
65 acI lineage depends on co-occurring microorganisms for the supply of various vitamins, amino acids, and  
66 reduced sulfur (28-30). Recently, Kang et al. (31) and Neuenschwander et al. (32) obtained transient axenic  
67 cultures of 20 acI strains in the acI-A, -B, and -C sublineages by dilution-to-extinction culturing. The complete  
68 genomes of these acI strains, obtained by whole-genome-amplification of the initial cultures, showed several  
69 characteristics of genome streamlining (33) such as small sizes (1.2–1.6 Mb), low G+C content, and high coding

70 density. Metabolic reconstruction based on the genome sequences predicted auxotrophy of all strains for several  
71 vitamin B compounds and reduced sulfurs, as well as tribe-specific auxotrophy for some amino acids.

72 Although rich genomic data were obtained from putatively axenic cultures of the acI lineage after various  
73 cultivation efforts, all initial cultures failed to become stably-growing pure cultures (31, 32). This lack of pure  
74 cultures prevents further investigations of the physiology and ecology of this lineage, which dominates  
75 freshwater bacterioplankton, in contrast to marine environments where stably growing pure cultures of several  
76 ubiquitous prokaryotic groups including *Prochlorococcus* (34), *Pelagibacter* (35), and *Nitrosopumilus* (36) are  
77 available.

78 In this study, we report the first establishment of stably growing pure cultures of the acI lineage. Two acI  
79 strains belonging to different tribes were successfully cultured and maintained by lowering the concentration of  
80 hydrogen peroxide (H<sub>2</sub>O<sub>2</sub>) in the culture media by catalase supplementation, rendering the acI lineage the first  
81 case supporting the Black Queen hypothesis (BQH) (37) for freshwater heterotrophs. Using these novel pure  
82 cultures, we analyzed the phenotypic characteristics of the acI strains and determined metabolic features that are  
83 difficult to predict based only on genome information as well as features conforming to previous genome-guided  
84 inferences. Several physiological features differed between the two acI strains, providing insight into the niche  
85 separation and spatiotemporal dynamics of diverse acI populations.

86

## 87 **Results and Discussion**

88 **Isolation of acI strains and efforts towards culture maintenance.** Strain IMCC25003 of the acI-A1 tribe and  
89 strain IMCC26103 of the acI-A4 tribe (3, 4) were isolated from Lake Soyang in Korea by dilution-to-extinction  
90 culturing (31). Strains IMCC25003 and IMCC26103 were most closely related to the recently proposed  
91 Candidatus species ‘*Ca. Planktophila sulfonica*’ MMS-IA-56 (100%) and ‘*Ca. Planktophila lacus*’ MMS-21-148  
92 (99.9%) (32), respectively, based on 16S rRNA gene phylogenetic analyses (*SI Appendix*, Fig. S1). According to  
93 the average nucleotide identity (ANI) (38) with their closest relatives (74–86%) (32), the two strains each  
94 represent novel species of the genus ‘*Ca. Planktophila*’.

95 Because the two strains are among the few acI isolates and the ability to maintain stably growing acI strains  
96 is prerequisite to studying the phenotypic characteristics of this lineage, we first attempted to resuscitate both  
97 strains from glycerol stocks using the same media used for isolation. IMCC26103 did not grow for 21 days after  
98 revival from the original frozen glycerol stocks but showed an abrupt increase in cell density (*SI Appendix*, Fig.  
99 S2A) because of the growth of contaminating strains (*SI Appendix*, Fig. S2B). IMCC25003 began growing

100 without a lag from the original frozen stocks and reached a cell density of  $7.6 \times 10^5$  cells mL<sup>-1</sup> in 5 days (*SI*  
101 *Appendix*, Fig. S2C; upper panel), but showed an atypical growth curve when the revived culture was transferred  
102 into the same medium on day 12 (*SI Appendix*, Fig. S2C; middle panel). When the first-transferred culture was  
103 inoculated again on day 15, no growth was detected until ~70 days (*SI Appendix*, Fig. S2C; lower panel).  
104 Because maintenance of the growing cultures of acI strains was not successful in the media used for their  
105 original isolation, further attempts to obtain stable cultures were made by introducing various modifications to  
106 the media composition. These attempts were possible only for IMCC25003, as many glycerol stocks were stored  
107 using the initially revived cultures of IMCC25003. Modifications to media composition were based on the  
108 putative metabolic features and growth requirements of the acI lineage predicted by approaches such as MAR-  
109 FISH and single-cell genomics (15, 23). Culture media contained various supplements of FAMV medium (*see SI*  
110 *Appendix*, Table S1 for media composition) such as carbon substrates, proteinogenic amino acids, peptone, and  
111 yeast extract and different basal media including artificial freshwater medium (39) and spent medium of  
112 *Limnohabitans* sp. IMCC26003 (*SI Appendix*, Table S2). However, growth of IMCC25003 was not detected  
113 under any culture conditions tested.

114

115 **Successful maintenance of stably growing acI cultures by catalase addition.** The failure to establish stable  
116 acI bacterial cultures by supplementation with defined or undefined nutrients led us to hypothesize that  
117 controlling the putative growth inhibitors may be more crucial than supplying growth promoters. Because the  
118 growth of *Prochlorococcus* and ammonia-oxidizing archaea was promoted when H<sub>2</sub>O<sub>2</sub> was removed (40-42), we  
119 examined whether catalase, an enzyme that degrades H<sub>2</sub>O<sub>2</sub>, could facilitate the cellular growth of IMCC25003,  
120 although the IMCC25003 genome contains *katG*, which codes for a bifunctional catalase-peroxidase.  
121 IMCC25003 showed good growth and reached a maximum cell density of  $2.7 \times 10^7$  cells mL<sup>-1</sup> in catalase (10 U  
122 mL<sup>-1</sup>)-amended medium (FAMV+CM+AA, *see* Materials and Methods for media composition), while no growth  
123 was detected in the medium devoid of catalase (*SI Appendix*, Fig. S3A). IMCC26103, which does not contain  
124 *katG*, was also successfully revived from the last-remained glycerol stocks in catalase-amended medium,  
125 reaching a maximum cell density of  $5.2 \times 10^7$  cells mL<sup>-1</sup> (*SI Appendix*, Fig. S3B). Because both strains exhibited  
126 robust and reproducible growth upon repeated transfer into media supplemented with catalase, catalase was  
127 considered as a critical supplement in acI strain cultivation.

128 Before further experiments, dilution-to-extinction culturing of the successfully revived strains was  
129 performed twice to ensure the purity of the cultures, resulting in the establishment of stably growing pure

130 cultures. The purity of the established cultures was verified by FISH (Fig. 1A), transmission electron microscopy  
131 (Fig. 1B), and whole genome sequencing followed by read mapping. Both strains produced reddish cell pellets  
132 because of the presence of carotenoids and actinorhodopsin in 4-L cultures (*SI Appendix*, Fig. S4A), which were  
133 subsequently used for genome sequencing. The genome sequences were identical (1 base pair difference) to  
134 those obtained by multiple displacement amplification in our previous study (31), with more even sequencing  
135 coverages (*SI Appendix*, Fig. S4B). For both strains, more than 99.9% of sequencing reads were mapped to the  
136 complete genomes, demonstrating that the cultures were pure.

137 To reconfirm the catalase-dependent growth, the two acI strains were cultivated with various concentrations  
138 of catalase (0–20 U mL<sup>-1</sup>). Growth of the strains was dependent on the presence of catalase, as no growth was  
139 detected in the absence of catalase, while 0.5 U mL<sup>-1</sup> catalase increased the cell density to ~10<sup>7</sup> cells mL<sup>-1</sup> (Fig. 2  
140 A and B). Cell densities and H<sub>2</sub>O<sub>2</sub> concentrations were simultaneously monitored in a catalase-spiked growth  
141 experiment to determine whether the pivotal role of catalase in promoting growth was mediated by degradation  
142 of H<sub>2</sub>O<sub>2</sub>. Without catalase, no cellular growth was detected (Fig. 2 C and D) and the H<sub>2</sub>O<sub>2</sub> concentration was  
143 maintained at the initial level of ~60 nM (Fig. 2 E and F). In contrast, when 10 U mL<sup>-1</sup> catalase was added at the  
144 time of inoculation, the H<sub>2</sub>O<sub>2</sub> concentration rapidly decreased to less than 10 nM and the acI strains began  
145 growing, reaching maximum cell densities in 6–9 days. When catalase was spiked at 7 or 13 days for  
146 IMCC25003 and 5 or 12 days for IMCC26103, the H<sub>2</sub>O<sub>2</sub> concentration rapidly decreased from ~60 to ~10 nM  
147 (Fig. 2 E and F). The acI strains, which showed no growth before catalase addition, began growing following the  
148 decrease in H<sub>2</sub>O<sub>2</sub> concentration immediately after catalase addition, indicating that H<sub>2</sub>O<sub>2</sub> removal by catalase  
149 was critical for maintaining the growth of the acI strains.

150 Among the several traits explained by the BQH (37) such as auxotrophy for vitamins or amino acids (33,  
151 43), the dependency on external H<sub>2</sub>O<sub>2</sub> scavengers is the first-reported and among the most representative cases of  
152 the BQH, discovered in two abundant marine autotrophic prokaryotic groups, *Prochlorococcus* and ammonia-  
153 oxidizing archaea (40–42). The dependency of cellular growth on the external H<sub>2</sub>O<sub>2</sub> scavenger found in this study  
154 makes the acI lineage the first freshwater bacterial example supporting the BQH, which explains the evolution of  
155 metabolic dependency of genome-streamlined oligotrophic bacteria on external ‘helpers’ in nutrient-depleted  
156 environments (33, 44). This crucial role of catalase in cultivating the acI strains was unexpected because all  
157 culture media used in cultivation trials contained pyruvate, a well-known chemical scavenger of H<sub>2</sub>O<sub>2</sub> (45, 46)  
158 and because acI bacteria failed to resuscitate from the original dilution cultures regardless of the presence of  
159 *katG* (31, 32). In this context, we first assumed that unknown growth factors were required for laboratory

160 cultivation rather than H<sub>2</sub>O<sub>2</sub> scavengers and thus we tested various nutrients and growth factors to revive the acI  
161 strains. However, only catalase treatment resulted in successful cultivation of the acI strains, while all other  
162 attempts failed. Our cultivation results suggest that acI bacteria grow only at very low concentrations of H<sub>2</sub>O<sub>2</sub>  
163 attainable by catalase addition under laboratory conditions, regardless of the presence of *katG*, suggesting that  
164 the metabolic dependency of bacterial groups cannot be predicted based solely on genome information.

165

166 **Characterization of KatG of the acI lineage.** Although *katG* was found only in IMCC25003, the two acI  
167 strains showed similar growth responses to H<sub>2</sub>O<sub>2</sub>, with no growth at high concentrations of H<sub>2</sub>O<sub>2</sub> but good  
168 growth at minute concentrations of H<sub>2</sub>O<sub>2</sub> lowered by catalase. This result indicates that *katG* in IMCC25003 or  
169 its gene product, bifunctional catalase-peroxidase (KatG), did not function properly to defend against H<sub>2</sub>O<sub>2</sub> in the  
170 culture experiments. Therefore, we first examined the expression of *katG* in IMCC25003 by qPCR. The qPCR  
171 results showed that *katG* was expressed and the relative expression level increased slightly with increasing H<sub>2</sub>O<sub>2</sub>  
172 concentrations (*SI Appendix*, Fig. S5). Next, *katG* of IMCC25003 was cloned and expressed in *E. coli* and the  
173 gene product was purified by affinity chromatography (*SI Appendix*, Fig. S6). The native molecular weight of  
174 IMCC25003 KatG was ~165 kDa (*SI Appendix*, Fig. S6D) and molecular weight of the subunit analyzed by  
175 SDS-PAGE was ~83 kDa (*SI Appendix*, Fig. S6A), indicating that IMCC25003 KatG formed a homodimer  
176 composed of two subunits. In an in-gel enzyme activity assay, IMCC25003 KatG showed both catalase and  
177 peroxidase activities but its catalase activity was much lower than that of bovine catalase (KatE), which belongs  
178 to the monofunctional catalase group and was supplemented into the culture media in this study (*SI Appendix*,  
179 Fig. S7). To more accurately assay the catalase activity of IMCC25003 KatG, decomposition of H<sub>2</sub>O<sub>2</sub> was  
180 plotted using varying amounts of enzymes (*SI Appendix*, Fig. S8). All enzymatic parameters including specific  
181 activity (U mg<sup>-1</sup>) and catalytic efficiency ( $k_{cat}/K_m$ ) showed that IMCC25003 KatG displayed lower catalase  
182 activities than those of other microbial KatGs reported previously, as well as KatE (*SI Appendix*, Table S3),  
183 suggesting that the activity of IMCC25003 KatG is not sufficient to overcome the growth inhibition by H<sub>2</sub>O<sub>2</sub>  
184 present in the culture media.

185 We investigated the distribution of *katG* among available acI genomes, as only one (IMCC25003) of four  
186 acI strains isolated from Lake Soyang contains *katG* (31). *katG* was detected in 14 of 20 complete acI genomes  
187 (*SI Appendix*, Table S4). When single-amplified genomes were included, 20 of 35 genomes carried *katG*. The  
188 distribution of *katG* in the acI lineage was biased toward acI-A compared to acI-B. Of the 25 acI-A genomes, 19  
189 carried *katGs*, while only one of 10 acI-B genomes contained *katG* (*SI Appendix*, Table S4); thus, we analyzed

190 the phylogenetic features of acI KatG proteins. Unexpectedly, phylogenetic analyses including diverse bacterial  
191 KatG proteins (47) indicated that KatGs of the acI lineage belonged to two distinct groups that are separated  
192 widely in the entire KatG tree (Fig. 3A). Further, this KatG phylogeny of the acI lineage was not consistent with  
193 a phylogenomic tree of the lineage based on conserved proteins (Fig. 3B). KatGs of the acI-A sublineage were  
194 divided into two different KatG groups depending on the tribes. acI-A1 and A2 KatGs formed group A, while  
195 acI-A4, A5, A6, and A7 KatGs formed group B together with KatG of acI-B4 (Fig. 3). These results indicate that  
196 complicated evolutionary processes occurred for KatG in the acI lineage. Because KatG of IMCC25003  
197 belonging to the group A showed low activity, it would be interesting to determine if KatGs belonging to group  
198 B also exhibit low catalase activity, as isolates containing group B KatG did not grow in lake water-based  
199 medium (32).

200

201 **Phenotypic characterization of the acI strains.** Establishment of stable pure cultures by catalase addition  
202 enabled the first phenotypic characterization of the acI lineage, including detailed morphology (Fig. 1B),  
203 temperature preference (*SI Appendix*, Fig. S9), fatty acid profile (*SI Appendix*, Table S5), growth requirement,  
204 and substrate utilization (Fig. 4), leading to the proposal of two novel species named as ‘*Ca. Planktophilia rubra*’  
205 (ru'bra. L. fem. adj. *rubra* reddish, pertaining to the reddish color of cells) for IMCC25003 and ‘*Ca. Planktophilia*  
206 *aquatilis*’ (a.qua.ti'lis. L. fem. adj. *aquatilis* living, growing, or found, in or near water, aquatic) for IMCC26103  
207 (*see SI Appendix, Supplementary Methods*). Actively growing cells of the two strains were curved rods of very  
208 small sizes and biovolumes of 0.041 (for IMCC25003) and 0.061  $\mu\text{m}^3$  (for IMCC26103), representing some of  
209 the smallest ultramicrobial (<0.1  $\mu\text{m}^3$ ) cells among known cultivated freshwater bacteria, but 1.6–2.4-fold larger  
210 cell volumes than those of other acI bacteria estimated by epifluorescence microscopy (32) (*SI Appendix*, Table  
211 S6).

212 The cell densities of IMCC25003 were increased by amino acids but not by carbon mixtures (Fig. 4A).  
213 Growth of IMCC26103 was enhanced by both amino acids and carbon mixtures, but the enhancement by carbon  
214 mixtures was observed only in the presence of amino acids (Fig. 4B). These results indicate that the growth of  
215 both strains was mainly limited by at least one of 20 amino acids and that IMCC26103 (but not IMCC25003)  
216 utilized at least one of the carbon sources added. In each carbon compound-amended experiment, no single  
217 carbon compound affected the growth of IMCC25003 (Fig. 4C), while ribose and glucose enhanced the growth  
218 of IMCC26103 (Fig. 4D). These results were supported by genomic information showing that the IMCC26103  
219 genome contained genes for D-ribose pyranase, ribokinase, and glucose ABC transporter, while these genes were



220 not found in the IMCC25003 genome. In each amino acid-amended test, methionine and cysteine increased the  
221 growth of both strains (Fig. 4 *E* and *F*), supporting the genome-based metabolic prediction that acI strains lack  
222 an assimilatory sulfate reduction pathway and thus require reduced sulfur compounds for growth (31).  
223 Interestingly, the two strains showed different preferences for reduced sulfur compounds. IMCC25003 preferred  
224 methionine (optimum at 250 nM) over cysteine (Fig. 4 *E* and *G*), while IMCC26103 preferred cysteine  
225 (optimum at 10 nM) over methionine (Fig. 4 *F* and *H*), which was difficult to predict from genome information.  
226 Although a limited number of substrates was tested, these differential preferences of different acI tribes on  
227 growth substrates may lead to niche differentiation, underlying the tribe-specific spatiotemporal dynamics of the  
228 acI lineage found in several cultivation-independent studies (6, 30, 48, 49).

229

230 **Concluding remarks.** We successfully maintained actively-growing pure cultures of the acI lineage, the most  
231 abundant freshwater bacterioplankton group, by supplementing catalase into the culture media to lower H<sub>2</sub>O<sub>2</sub>  
232 concentration, enabling further analysis of the physiological properties that could not be inferred from genome  
233 sequences alone. This simple catalase-supplement method may accelerate the cultivation of bacterioplankton  
234 with streamlined genomes and thus contribute to studies of the ecological roles of ubiquitous and abundant  
235 freshwater oligotrophic bacteria.

236

## 237 **Materials and Methods**

238 Please see *SI Appendix* for experimental details on “Measurement of bacterial cell densities”, “Measurement of  
239 *katG* expression by qPCR”, “Expression, purification, and characterization of KatG from IMCC25003”, and  
240 “Phylogenetic analyses based on 16S rRNA gene, whole genome, and KatG protein”.

241

### 242 **Initial isolation of the acI stains, medium preparation, and revival experiments**

243 Freshwater collection, initial isolation, and identification of strains IMCC25003 and IMCC26103 were  
244 described in our previous study (31). Briefly, both strains were initially isolated as liquid cultures by high-  
245 throughput culturing method based on dilution-to-extinction in 0.2 μm-filtered and autoclaved freshwater media  
246 supplemented with very low levels of carbon compounds, amino acids mixture, and vitamin mixture. Two  
247 cryovials each containing 200 μL of initial high-throughput cultures suspended in 10% (v/v) sterile glycerol were  
248 stored at -80°C and used for further revival experiments. As shown in *SI Appendix*, Fig. S2, the axenic culture of

249 IMCC25003 was obtained from the revival experiments, which was further used in the following experiments to  
250 establish stably maintained pure cultures of IMCC25003.

251 Culture media for reviving IMCC25003 were prepared based on natural freshwater (*see SI Appendix*, Table  
252 S1 for culture media ingredients). Natural freshwater collected at a depth of 1 m from the Dam station  
253 (37°56'50.6" N, 127°49'7.9" E) of Lake Soyang in February 2016 was filtered through a 0.2- $\mu$ m pore-size  
254 membrane filter (Supor, Pall Corporation), autoclaved for 1.5 h, and aerated for 3 h. The filtered-autoclaved-  
255 aerated medium was supplemented with 10  $\mu$ M NH<sub>4</sub>Cl, 10  $\mu$ M KH<sub>2</sub>PO<sub>4</sub>, and trace metal mixture (50), which was  
256 designated as FAM (filtered and autoclaved freshwater medium). The FAM medium supplemented with the  
257 vitamin mixture (51) (*SI Appendix*, Table S1), designated as FAMV, was used as a basal medium that did not  
258 contain extra-amended organic compounds. FAMV supplemented with a carbon mixture (CM; 50  $\mu$ M pyruvate,  
259 5  $\mu$ M D-glucose, 5  $\mu$ M *N*-acetyl-D-glucosamine, 5  $\mu$ M D-ribose, and 5  $\mu$ M methyl alcohol) and amino acid  
260 mixture (AA; 20 proteinogenic amino acids, 100 nM each) were prepared and used as basal heterotrophic growth  
261 media.

262 As the first attempt to obtain a stable culture of IMCC25003 (*SI Appendix*, Table S2), a 100- $\mu$ L glycerol  
263 stock of IMCC25003 was inoculated into 20 mL of FAMV, FAMV amended with CM (FAMV+CM), FAMV  
264 amended with AA (FAMV+AA), and FAMV amended with CM and AA (FAMV+CM+AA). Different  
265 concentrations (0.5 $\times$ , 1 $\times$ , 5 $\times$ , and 10 $\times$ ) of CM were added to FAMV+AA and the growth of IMCC25003 was  
266 tested. A 0.1- $\mu$ m-filtered but non-autoclaved freshwater medium (FM) and artificial freshwater medium (39)  
267 each supplemented with vitamin mixture, CM, and AA were also tested. In the second attempt, the following  
268 organic nutrients were individually supplemented into FAMV+CM+AA: 20  $\mu$ M acetate, 20  $\mu$ M oxaloacetate, 20  
269  $\mu$ M putrescine, 20  $\mu$ M glycerol, 20  $\mu$ M xylose, 1 mg L<sup>-1</sup> proteose peptone, and 1 mg L<sup>-1</sup> yeast extract. In the third  
270 attempt, the spent medium of the genus *Limnohabitans* which is often considered as a co-occurring bacterium  
271 with acI bacteria, was added to the growth test medium. *Limnohabitans* sp. IMCC26003 grew to  $3.1 \times 10^6$  cells  
272 mL<sup>-1</sup> in 100 mL of FAMV+CM+AA at 25°C for 2 weeks. After the *Limnohabitans* culture was filtered through a  
273 0.2- $\mu$ m pore-size membrane followed by a 0.1- $\mu$ m pore-size membrane, 1 mL of the filtrate of the spent medium  
274 and 100  $\mu$ L of glycerol stock of IMCC25003 were inoculated into 20 mL of FAMV+CM+AA. In the fourth  
275 attempt, catalase (from bovine liver, C9322, Sigma-Aldrich) stock solution (10<sup>5</sup> U mL<sup>-1</sup> in 10 mM PBS, pH 7.4)  
276 was added to FAMV+CM+AA at a final concentration of 10 U mL<sup>-1</sup> and 100  $\mu$ L glycerol stock of IMCC25003  
277 was inoculated. All reviving tests were performed at 18°C for 5 weeks.

278

279 **Culture maintenance and confirmation of culture purity**

280 Bacterial cultures of strains IMCC25003 and IMCC26103 revived first from glycerol stocks by catalase  
281 amendment were purified twice by dilution-to-extinction culturing using FAMV+CM+AA containing 10 U mL<sup>-1</sup>  
282 of catalase. Cells were diluted to 5, 1, or 0.1 cells mL<sup>-1</sup> and dispensed into 48-well plates (1 mL per each well).  
283 After incubation, growth-positive wells (>10<sup>5</sup> cells mL<sup>-1</sup>) from the most diluted inoculum (0.1 cells mL<sup>-1</sup>) were  
284 used for next round of dilution-to-extinction, resulting in the establishment of stably-growing pure cultures.

285 To confirm the purity of the established pure cultures by FISH, 5 mL of exponentially grown cells were  
286 fixed with 2% paraformaldehyde (in PBS, pH 7.4) and filtered through 0.2- $\mu$ m polycarbonate filters (Isopore,  
287 Millipore). Hybridization was performed at 35°C for 6 h in hybridization buffer [900 mM NaCl, 20 mM Tris (pH  
288 7.4), 0.01% SDS, 15% formamide] with Cy3-labeled oligonucleotide probes (AcI-852 and AcI-1214; 2 ng  $\mu$ L<sup>-1</sup>  
289 each) and helper probes (AcI-852-H1 and AcI-852-H2; 2 ng  $\mu$ L<sup>-1</sup> each) targeting the acI lineage (52). After  
290 washing the membranes twice with washing buffer [150 mM NaCl, 20 mM Tris (pH 7.4), 6 mM EDTA, and  
291 0.01% SDS] at 55°C for 10 min followed by DAPI (4,6-diamidino-2-phenylindole) staining, Cy3-positive and  
292 DAPI-positive cells were visualized with a confocal laser scanning microscope (LSM 510 META, Carl Zeiss).

293 For purity confirmation by genome sequencing, the two strains were cultivated in 4 L of FAMV+CM+AA  
294 supplemented with 10 U mL<sup>-1</sup> of catalase. Cells were harvested by centrifugation at 20,000  $\times g$  for 120 min and  
295 the cell pellets (*SI Appendix*, Fig. S4A) were used for genomic DNA extraction. Sequencing libraries were  
296 constructed using the Nextera library preparation kit (Illumina). Genome sequencing was performed on an  
297 Illumina MiSeq platform (2  $\times$  300 bp) by ChunLab, Inc (Seoul, Republic of Korea). Raw sequencing data were  
298 assembled using SPAdes 3.9.0 (53), resulting in a circularly closed complete genome for both strains.  
299 Comparison of the genome sequences obtained in this study to those obtained by multiple displacement  
300 amplification (31) was performed using BLASTn. Calculation of sequencing coverages and estimation of culture  
301 purity based on reads mapping were performed as described by Kang *et al.* (31), using the ‘depth’ and ‘flagstat’  
302 options in samtools.

303 After purification, both strains were stored as 10% (v/v) glycerol suspensions at -80°C and working  
304 cultures were maintained in FAMV+CM+AA supplemented with 1 U mL<sup>-1</sup> of catalase at 25°C. Throughout this  
305 study, the peak shape of the cultures in the flow cytometry, morphology of SYBR Green I-stained cells in  
306 epifluorescence microscopy, FISH images obtained using acI-specific probes, and electropherograms from 16S  
307 rRNA gene sequencing were routinely examined to evaluate culture purity.

308

### 309 **Characterization of catalase-dependent growth properties**

310 The effects of the catalase concentration on the growth of strains IMCC25003 and IMCC26103 were tested  
311 in triplicate in FAMV+CM+AA supplemented with 0.5, 1, 5, 10, and 20 U mL<sup>-1</sup> of catalase at 25°C. Bacterial  
312 cell densities were measured by flow cytometry every 2 days.

313 To confirm that catalase enhanced cellular growth and decreased H<sub>2</sub>O<sub>2</sub> concentration, 10 U mL<sup>-1</sup> of catalase  
314 was added to IMCC25003-inoculated culture medium (FAMV+CM+AA) that had been maintained for 0, 7, and  
315 13 days without catalase treatment. Similarly, for strain IMCC26103, 10 U mL<sup>-1</sup> of catalase was spiked at 0, 5,  
316 and 12 days. Cultures maintained without catalase were used as controls. For all cultures, cell densities were  
317 monitored every day by flow cytometry. At the same time, the concentration of H<sub>2</sub>O<sub>2</sub> in the culture medium was  
318 measured using the modified acridinium ester chemiluminescence method (54) described below.

319

### 320 **Determination of hydrogen peroxide concentration**

321 A modified acridinium ester chemiluminescence method (54) was used to determine H<sub>2</sub>O<sub>2</sub> concentrations in  
322 the culture medium. To measure H<sub>2</sub>O<sub>2</sub> concentrations at the nanomolar level, acridinium NHS ester (A63063;  
323 Cayman Chemical) was used as an indicator and the resulting chemiluminescence was estimated using a  
324 SpectraMax L microplate Reader (Molecular Devices). A standard curve for H<sub>2</sub>O<sub>2</sub> was prepared in the range of  
325 0.02–2.0 µM by diluting 30% (v/v) of H<sub>2</sub>O<sub>2</sub> solution (H1009; Sigma-Aldrich) with ddH<sub>2</sub>O. The acridinium ester-  
326 H<sub>2</sub>O<sub>2</sub> response signal was integrated for 13 s after sequential injections of 20 µL 2 M Na<sub>2</sub>CO<sub>3</sub> (pH 11.3) followed  
327 by 80 µL of 2.2 mg L<sup>-1</sup> acridinium ester (in 1 mM phosphate buffer, pH 3) at 300 µL s<sup>-1</sup> injection flow speed and  
328 0.1-s interval. All measurements were conducted in triplicate at 20°C.

329

### 330 **Morphological and physiological characterization of acI strains**

331 Cell morphology was examined by transmission electron microscopy (CM200, Philips) using whole cell  
332 staining and thin-sectioning. For whole cell staining, 20-mL cultures were gently filtered using a 0.2-µm pore  
333 size polycarbonate membrane on which formvar/carbon-coated copper grids were placed, followed by staining  
334 of the grids with 0.5% uranyl acetate. To prepare thin-sectioned samples, cell pellets were harvested by  
335 centrifugation of 2-L cultures at 20,000 ×g for 120 min. Cell pellets that were primary fixed with 2.0%  
336 Karnovsky's fixative and secondary fixed with 1.0% osmium tetroxide were dehydrated using ethanol series  
337 from 35% to 100% and Epon 812 resin was infiltrated. Ultrathin sections (70-nm) were prepared with an

338 ultramicrotome using a diamond knife, placed on formvar/carbon-coated copper grids, and double-stained with  
339 2% uranyl acetate and 0.5% lead oxide.

340 The temperature range for growth of the two acI strains was monitored at 10–35°C in FAMV+CM+AA  
341 supplemented with 10 U mL<sup>-1</sup> of catalase. After the optimum temperature had been determined, all growth  
342 experiments were performed in triplicate at 25°C in different growth media supplemented with 10 U mL<sup>-1</sup> of  
343 catalase. The growth curves in FAMV, FAMV+CM, FAMV+AA, and FAMV+CM+AA were determined to  
344 evaluate the effects of carbon compound mixtures and amino acids mixtures on cellular growth. To identify  
345 which amino acids are required for growth, 20 individual amino acids were supplemented in the FAMV medium  
346 at 100 nM and cellular growth was monitored. Similarly, 5 individual carbon sources (50 µM pyruvate, 5 µM D-  
347 glucose, 5 µM *N*-acetyl-D-glucosamine, 5 µM D-ribose, and 5 µM methyl alcohol) were supplemented into  
348 FAMV+AA and the growth curves were determined. To determine the optimal concentration of reduced sulfur  
349 compounds, growth of the acI strains was measured at 0–10 µM of methionine (for IMCC25003) and cysteine  
350 (for IMCC26103).

351 Cellular fatty acid profiles were determined using cells harvested from 2-L cultures grown in  
352 FAMV+CM+AA supplemented with 10 U mL<sup>-1</sup> of catalase. Fatty acid methyl esters were extracted from cell  
353 pellets using the standard protocol for the Sherlock Microbial Identification System (MIDI, Inc.) and analyzed  
354 by gas chromatography (Agilent 7890 GC) based on MIDI version 6.1 with the TSBA6 database (55).

355

#### 356 **Data availability**

357 The complete genome sequences of strains IMCC25003 and IMCC26103 obtained from cell pellets using  
358 the Illumina MiSeq platform have been deposited in GenBank with the accession numbers CP029557 for  
359 IMCC25003 and CP029558 for IMCC26103.

360

#### 361 **ACKNOWLEDGEMENTS**

362 This study was supported by the Mid-Career Research Program (to J-CC, No. NRF-2016R1A2B2015142)  
363 and Science Research Center grant (to J-CC, No. NRF-2018R1A5A1025077) through the National Research  
364 Foundation (NRF) funded by the Ministry of Sciences and ICT, and by the Basic Science Research Program funded  
365 by the Ministry of Education, Republic of Korea (to IK, No. NRF-2016R1A6A3A11934789; to J-HS, No. NRF-  
366 2016R1A6A3A11935361).

367

368 **References**

- 369 1. Glöckner FO, et al. (2000) Comparative 16S rRNA analysis of lake bacterioplankton reveals globally  
370 distributed phylogenetic clusters including an abundant group of actinobacteria. *Appl Environ Microbiol*  
371 66(11):5053-5065.
- 372 2. Zwart G, Crump BC, Agterveld MPK-v, Hagen F, Han S-K (2002) Typical freshwater bacteria: an  
373 analysis of available 16S rRNA gene sequences from plankton of lakes and rivers. *Aquat Microb Ecol*  
374 28(2):141-155.
- 375 3. Warnecke F, Amann R, Pernthaler J (2004) Actinobacterial 16S rRNA genes from freshwater habitats  
376 cluster in four distinct lineages. *Environ Microbiol* 6(3):242-253.
- 377 4. Newton RJ, Jones SE, Eiler A, McMahon KD, Bertilsson S (2011) A guide to the natural history of  
378 freshwater lake bacteria. *Microbiol Mol Biol Rev* 75(1):14-49.
- 379 5. Parfenova VV, Gladkikh AS, Belykh OI (2013) Comparative analysis of biodiversity in the planktonic  
380 and biofilm bacterial communities in Lake Baikal. *Microbiology* 82(1):91-101.
- 381 6. Newton RJ, McLellan SL (2015) A unique assemblage of cosmopolitan freshwater bacteria and higher  
382 community diversity differentiate an urbanized estuary from oligotrophic Lake Michigan. *Front*  
383 *Microbiol* 6:1028.
- 384 7. Li J, et al. (2015) Annual periodicity in planktonic bacterial and archaeal community composition of  
385 eutrophic Lake Taihu. *Sci Rep* 5:15488.
- 386 8. Henson M, et al. (2018) Nutrient dynamics and stream order influence microbial community patterns  
387 along a 2914 kilometer transect of the Mississippi River. *Limnol and Oceanogr.*  
388 <https://doi.org/10.1002/lno.10811>
- 389 9. Satinsky B, et al. (2015) Metagenomic and metatranscriptomic inventories of the lower Amazon River,  
390 May 2011. *Microbiome* 3(1):39.
- 391 10. Savio D, et al. (2015) Bacterial diversity along a 2600 km river continuum. *Environ Microbiol*  
392 17(12):4994-5007.
- 393 11. Allgaier M, Grossart H-P (2006) Diversity and seasonal dynamics of Actinobacteria populations in four  
394 lakes in northeastern Germany. *Appl Environ Microbiol* 72(5):3489-3497.
- 395 12. Allgaier M, Brückner S, Jaspers E, Grossart H-P (2007) Intra- and inter-lake variability of free-living  
396 and particle-associated *Actinobacteria* communities. *Environ Microbiol* 9(11):2728-2741.

- 397 13. Newton RJ, Jones SE, Helmus MR, McMahon KD (2007) Phylogenetic Ecology of the Freshwater  
398 *Actinobacteria* acI Lineage. *Appl Environ Microbiol* 73(22):7169-7176.
- 399 14. Eckert EM, Salcher MM, Posch T, Eugster B, Pernthaler J (2012) Rapid successions affect microbial N-  
400 acetyl-glucosamine uptake patterns during a lacustrine spring phytoplankton bloom. *Environ Microbiol*  
401 14(3):794-806.
- 402 15. Salcher MM, Posch T, Pernthaler J (2013) In situ substrate preferences of abundant bacterioplankton  
403 populations in a prealpine freshwater lake. *ISME J* 7(5):896-907.
- 404 16. Pérez MT, Hörtnagl P, Sommaruga R (2010) Contrasting ability to take up leucine and thymidine  
405 among freshwater bacterial groups: implications for bacterial production measurements. *Environ*  
406 *Microbiol* 12(1):74-82.
- 407 17. Buck U, Grossart H-P, Amann R, Pernthaler J (2009) Substrate incorporation patterns of  
408 bacterioplankton populations in stratified and mixed waters of a humic lake. *Environ Microbiol*  
409 11(7):1854-1865.
- 410 18. Ghai R, et al. (2011) Metagenomics of the Water Column in the Pristine Upper Course of the Amazon  
411 River. *PLoS One* 6(8):e23785.
- 412 19. Ghai R, McMahon KD, Rodriguez-Valera F (2012) Breaking a paradigm: cosmopolitan and abundant  
413 freshwater actinobacteria are low GC. *Environ Microbiol Rep* 4(1):29-35.
- 414 20. Sharma AK, et al. (2009) Actinorhodopsin genes discovered in diverse freshwater habitats and among  
415 cultivated freshwater *Actinobacteria*. *ISME J* 3(6):726-737.
- 416 21. Martinez-Garcia M, et al. (2011) High-throughput single-cell sequencing identifies photoheterotrophs  
417 and chemoautotrophs in freshwater bacterioplankton. *ISME J* 6(1):113-23.
- 418 22. Garcia SL, et al. (2013) Metabolic potential of a single cell belonging to one of the most abundant  
419 lineages in freshwater bacterioplankton. *ISME J* 7(1):137-147.
- 420 23. Ghylis TW, et al. (2014) Comparative single-cell genomics reveals potential ecological niches for the  
421 freshwater acI *Actinobacteria* lineage. *ISME J* 8(12):2503-2516.
- 422 24. Ghai R, Mizuno CM, Picazo A, Camacho A, Rodriguez-Valera F (2014) Key roles for freshwater  
423 *Actinobacteria* revealed by deep metagenomic sequencing. *Mol Ecol* 23(24):6073-6090.
- 424 25. Salcher MM, Šimek K (2016) Isolation and cultivation of planktonic freshwater microbes is essential  
425 for a comprehensive understanding of their ecology. *Aquat Microb Ecol* 77(3):183-196.



- 426 26. Rappé MS (2013) Stabilizing the foundation of the house that ‘omics builds: the evolving value of  
427 cultured isolates to marine microbiology. *Curr Opin Microbiol* 16(5):618-624.
- 428 27. Jezbera J, Sharma AK, Brandt U, Doolittle WF, Hahn MW (2009) ‘*Candidatus* Planktophilia limnetica’,  
429 an actinobacterium representing one of the most numerically important taxa in freshwater  
430 bacterioplankton. *Int J Syst Evol Microbiol* 59(11):2864-2869.
- 431 28. Garcia SL, McMahon KD, Grossart HP, Warnecke F (2014) Successful enrichment of the ubiquitous  
432 freshwater acI Actinobacteria. *Environ Microbiol Rep* 6(1):21-27.
- 433 29. Garcia SL, et al. (2015) Auxotrophy and intrapopulation complementary in the ‘interactome’ of a  
434 cultivated freshwater model community. *Mol Ecol* 24(17):4449-4459.
- 435 30. Garcia SL, et al. (2018) Contrasting patterns of genome-level diversity across distinct co-occurring  
436 bacterial populations. *ISME J* 12(3):742-755.
- 437 31. Kang I, Kim S, Islam MR, Cho J-C (2017) The first complete genome sequences of the acI lineage, the  
438 most abundant freshwater Actinobacteria, obtained by whole-genome-amplification of dilution-to-  
439 extinction cultures. *Sci Rep* 7:42252.
- 440 32. Neuenschwander SM, Ghai R, Pernthaler J, Salcher MM (2018) Microdiversification in genome-  
441 streamlined ubiquitous freshwater *Actinobacteria*. *ISME J* 12(1):185-198.
- 442 33. Giovannoni SJ, Cameron Thrash J, Temperton B (2014) Implications of streamlining theory for  
443 microbial ecology. *ISME J* 8(8):1553-1565.
- 444 34. Moore LR, Rocap G, Chisholm SW (1998) Physiology and molecular phylogeny of coexisting  
445 *Prochlorococcus* ecotypes. *Nature* 393(6684):464-467.
- 446 35. Rappé MS, Connon SA, Vergin KL, Giovannoni SJ (2002) Cultivation of the ubiquitous SAR11 marine  
447 bacterioplankton clade. *Nature* 418(6898):630-633.
- 448 36. Konneke M, et al. (2005) Isolation of an autotrophic ammonia-oxidizing marine archaeon. *Nature*  
449 437(7058):543-546.
- 450 37. Morris JJ, Lenski RE, Zinser ER (2012) The Black Queen Hypothesis: Evolution of Dependencies  
451 through Adaptive Gene Loss. *MBio* 3(2).
- 452 38. Konstantinidis KT, Tiedje JM (2005) Genomic insights that advance the species definition for  
453 prokaryotes. *Proc Natl Acad Sci USA* 102(7):2567-2572.



- 454 39. Kim S, Kang I, Cho JC (2017) Genomic Analysis of a freshwater actinobacterium, "*Candidatus*  
455 *Limnosphaera aquatica*" strain IMCC26207, isolated from Lake Soyang. *J Microbiol Biotechnol*  
456 27(4):825-833.
- 457 40. Morris JJ, Kirkegaard R, Szul MJ, Johnson ZI, Zinser ER (2008) Facilitation of robust growth of  
458 *Prochlorococcus* colonies and dilute liquid cultures by "Helper" heterotrophic bacteria. *Appl Environ*  
459 *Microbiol* 74(14):4530-4534.
- 460 41. Morris JJ, Johnson ZI, Szul MJ, Keller M, Zinser ER (2011) Dependence of the cyanobacterium  
461 *Prochlorococcus* on hydrogen peroxide scavenging microbes for growth at the ocean's surface. *PLoS*  
462 *One* 6(2):e16805.
- 463 42. Kim JG, et al. (2016) Hydrogen peroxide detoxification is a key mechanism for growth of ammonia-  
464 oxidizing archaea. *Proc Natl Acad Sci USA* 113(28):7888-7893.
- 465 43. D'Souza G, Kost C (2016) Experimental evolution of metabolic dependency in Bacteria. *PLoS Genet*  
466 12(11):e1006364.
- 467 44. Morris JJ, Papoulis SE, Lenski RE (2014) Coexistence of evolving Bacteria stabilized by a shared black  
468 queen function. *Evolution* 68(10):2960-2971.
- 469 45. Desagher S, Glowinski J, Premont J (1997) Pyruvate protects neurons against hydrogen peroxide-  
470 induced toxicity. *J Neurosci* 17(23):9060-9067.
- 471 46. Varma SD, Hegde KR (2007) Lens thiol depletion by peroxyxynitrite. Protective effect of pyruvate. *Mol*  
472 *Cell Biochem* 298(1-2):199-204.
- 473 47. Zamocky M, Gasselhuber B, Furtmuller PG, Obinger C (2012) Molecular evolution of hydrogen  
474 peroxide degrading enzymes. *Arch Biochem Biophys* 525(2):131-144.
- 475 48. Berry MA, et al. (2017) Cyanobacterial harmful algal blooms are a biological disturbance to Western  
476 Lake Erie bacterial communities. *Environ Microbiol* 19(3):1149-1162.
- 477 49. Okazaki Y, Nakano S-I (2016) Vertical partitioning of freshwater bacterioplankton community in a deep  
478 mesotrophic lake with a fully oxygenated hypolimnion (Lake Biwa, Japan). *Environ Microbiol Rep*  
479 8(5).
- 480 50. Carini P, Steindler L, Beszteri S, Giovannoni SJ (2013) Nutrient requirements for growth of the extreme  
481 oligotroph '*Candidatus Pelagibacter ubique*' HTCC1062 on a defined medium. *ISME J* 7(3):592-602.
- 482 51. Davis HC, Guillard RRL (1958) Relative value of ten genera of micro-organisms as food for oyster and  
483 clam larvae. *Fish Bull. (Wash. D. C.)* 58:293-304.

- 484 52. Warnecke F, Sommaruga R, Sekar R, Hofer JS, Pernthaler J (2005) Abundances, identity, and growth  
485 state of actinobacteria in mountain lakes of different UV transparency. *Appl Environ Microbiol*  
486 71(9):5551-5559.
- 487 53. Bankevich A, et al. (2012) SPAdes: a new genome assembly algorithm and its applications to single-cell  
488 sequencing. *J Comput Biol* 19(5):455-477.
- 489 54. King DW, et al. (2007) Flow injection analysis of H<sub>2</sub>O<sub>2</sub> in natural waters using acridinium ester  
490 chemiluminescence: method development and optimization using a kinetic model. *Anal Chem*  
491 79(11):4169-4176.
- 492 55. Sasser M (1990) Identification of bacteria by gas chromatography of cellular fatty acids. MIDI  
493 Technical Note 101. Newark, DE: MIDI Inc.

494 **Figures**

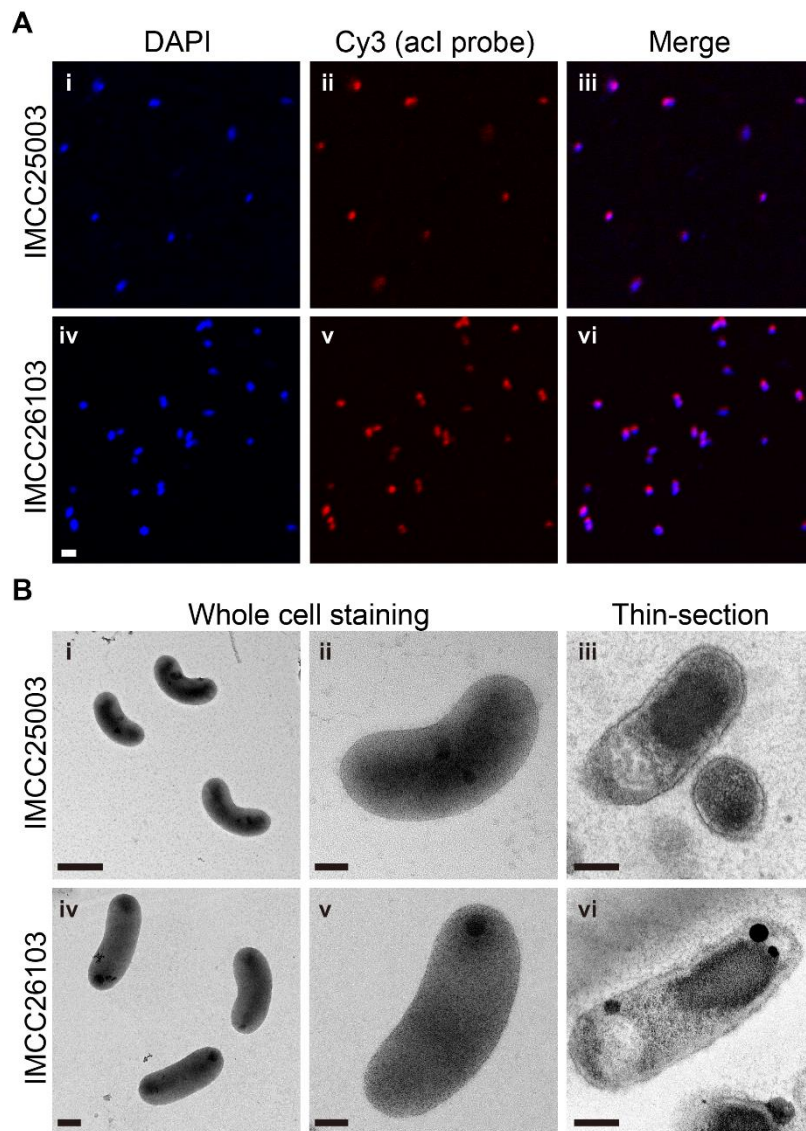

495

496 **Fig. 1.** Microscopic examination of the two acI strains for purity evaluation and morphological characterization.

497 (A) Demonstration of culture purity of strains IMCC25003 (upper; i, ii, and iii) and IMCC26103 (lower; iv, v,

498 and vi) by FISH analysis. The acI cells were dual-stained with DAPI (i and iv) and Cy3-conjugated

499 oligonucleotide probes specific to the acI lineage (AcI-852 and AcI-1214) (ii and v). Merged images are shown

500 in iii and vi. Bar, 1  $\mu\text{m}$ . (B) Cell morphology of strains IMCC25003 (upper; i, ii, and iii) and IMCC26103

501 (lower; iv, v, and vi) examined by transmission electron microscopy. The acI cells were stained with uranyl

502 acetate (i, ii, iv, and v) or double stained with uranyl acetate and lead oxide after thin-sectioning (iii and vi).

503 Scale bars; 0.5  $\mu\text{m}$  (i), 0.2  $\mu\text{m}$  (iv), and 0.1  $\mu\text{m}$  (ii, iii, v, and vi).

504

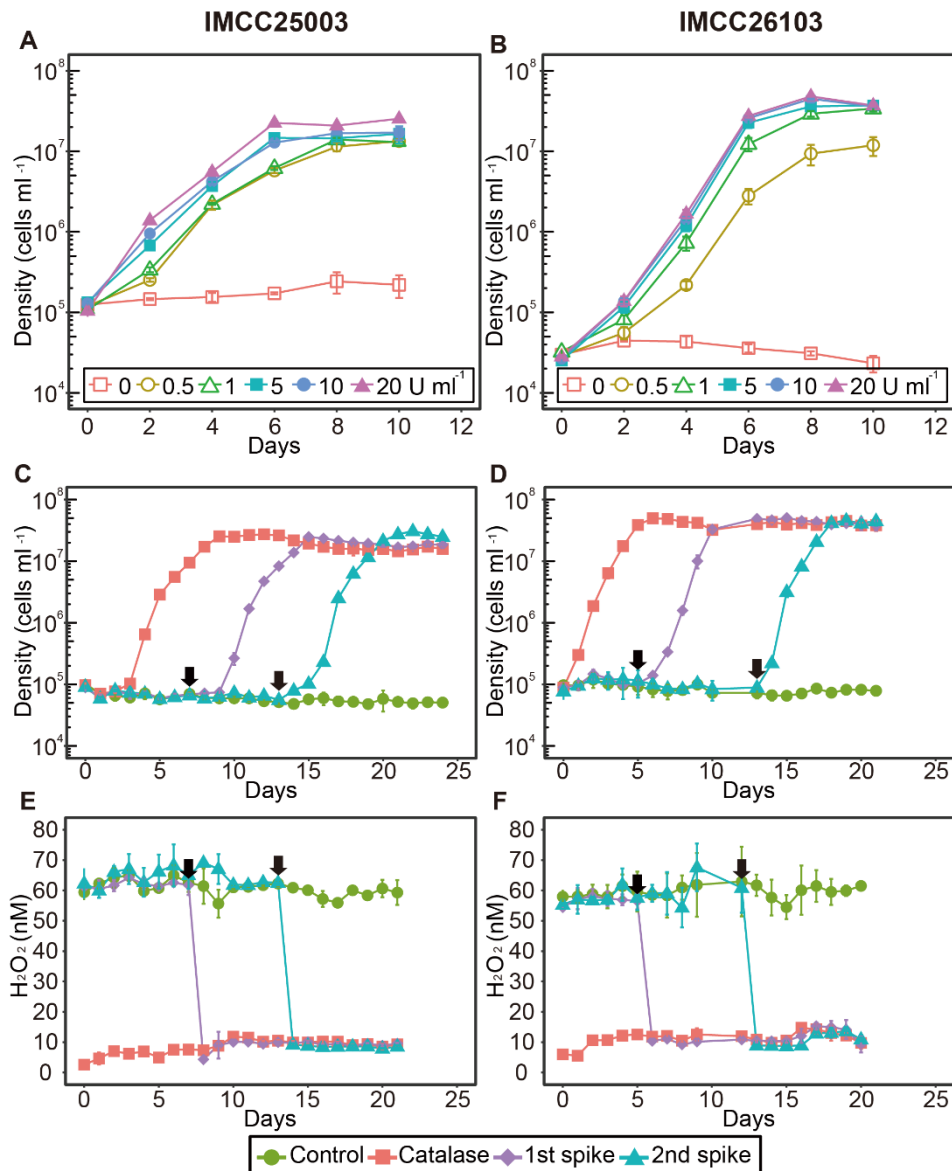

505 **Fig. 2.** Catalase-dependent growth of the two acI strains. (A and B) The effect of various concentrations (0–20 U  
506 mL<sup>-1</sup>) of catalase on the growth of strains IMCC25003 (A) and IMCC26103 (B). (C–F) The effect of catalase  
507 addition on cell densities (C and D) and H<sub>2</sub>O<sub>2</sub> concentrations (E and F) during cultivation of strains IMCC25003  
508 (C and E) and IMCC26103 (D and F). Catalase (10 U mL<sup>-1</sup>) was added to the culture media at day 0 (‘Catalase’)  
509 or days indicated by black arrows (‘1<sup>st</sup> spike’ and ‘2<sup>nd</sup> spike’). No catalase was added to the cultures designated  
510 as ‘Control’. All experiments were performed in triplicate using the culture medium FAMV+CM+AA (Table  
511 S1). Error bars indicate standard deviation. Note that error bars shorter than the size of the symbols are hidden.  
512

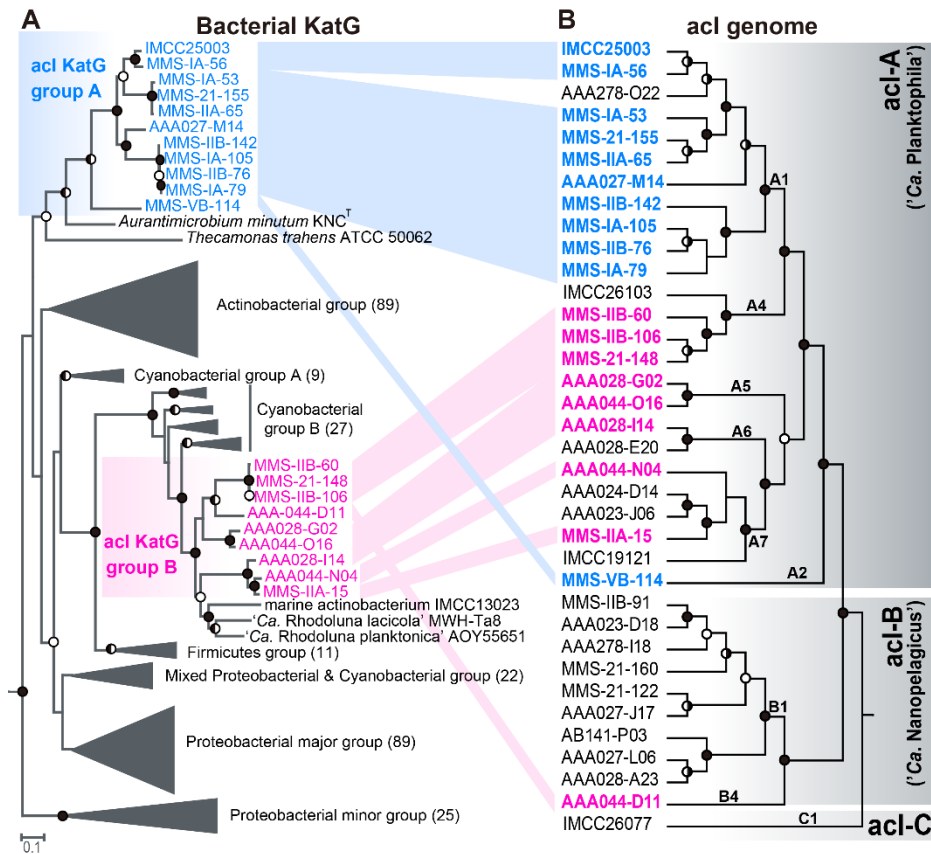

513

514 **Fig. 3.** Comparison between a phylogenetic tree of bacterial KatG proteins and phylogenomic tree of members  
515 of the acI lineage. (A) A maximum-likelihood tree of bacterial KatG protein sequences including those predicted  
516 in the acI genomes. The acI KatG proteins are indicated in color (blue and red for acI KatG group A and B,  
517 respectively), while other bacterial KatG proteins were grouped following the scheme proposed by Zamocky *et*  
518 *al.* (47). The number of proteins included in each KatG group are indicated within parentheses at the end of  
519 group names. The KatG sequences of *Rhodospirillum rubrum* and *Pirellula staleyi* (both from the phylum  
520 *Planctomycetes*) were used as the outgroup. (B) A phylogenomic tree of members of the acI lineage constructed  
521 using concatenated alignment of conserved marker proteins. The acI strains containing *katG* are indicated in  
522 color according to the grouping in the left KatG tree. The SAG AAA027-D23 (belonging to the acSTL-A1 tribe)  
523 (30) was set as an outgroup. Only the tree topologies are shown, and branch lengths do not represent  
524 phylogenetic distances. For both trees, bootstrap values (from 100 and 250 replicates for the KatG tree and  
525 phylogenomic tree, respectively) are shown at the nodes as filled circles ( $\geq 90\%$ ), half-filled circles ( $\geq 70\%$ ), and  
526 empty circles ( $\geq 50\%$ ).

527

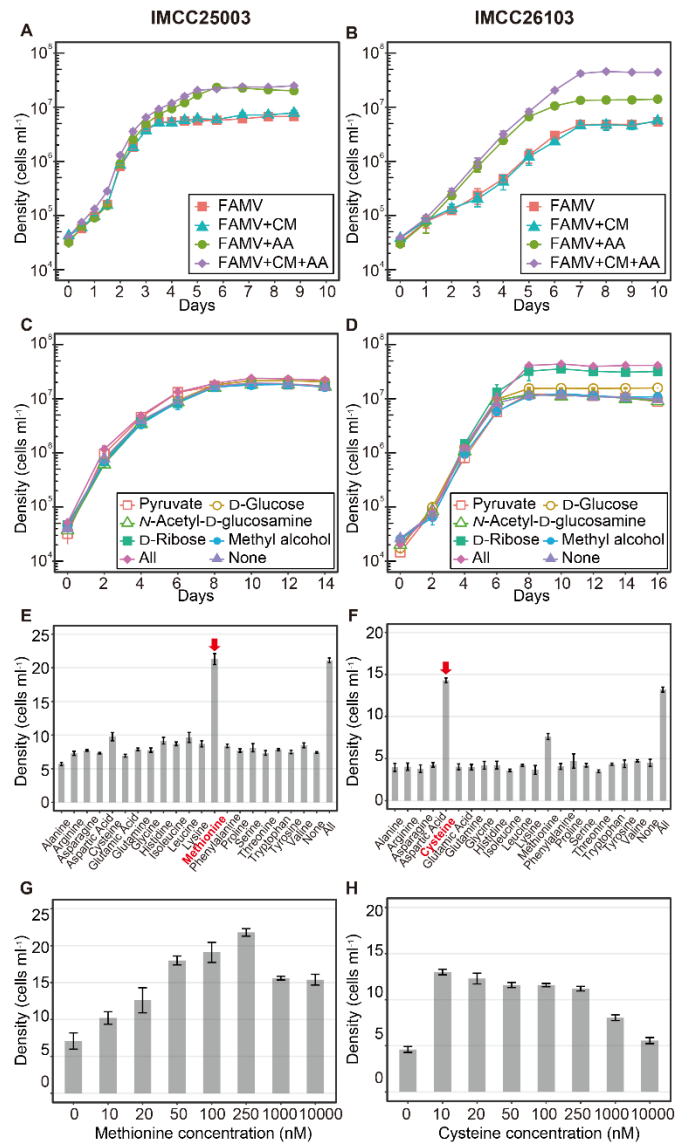

528

529 **Fig. 4.** Effects of carbon sources and amino acids on the growth of the acI strains IMCC25003 (figures on the  
530 left: A, C, E, and G) and IMCC26103 (figures on the right: B, D, F, and H). (A and B) Effects of amino acid  
531 mixture (AA) and/or carbon source mixture (CM). AA and CM were added to the FAMV medium separately or  
532 together. Detailed medium composition is presented in Table S1. (C and D) Effects of individual carbon  
533 compound. Each of 5 carbon compounds [5  $\mu$ M, except for pyruvate (50  $\mu$ M)] was added to the FAMV+AA  
534 medium. All, 5 carbon substrates were added together; None, no carbon source was added. (E and F) Effects of  
535 individual amino acids. Each of 20 proteinogenic amino acids was added at a concentration of 100 nM to the  
536 basal medium FAMV. All, 20 amino acids were added together; None, no amino acid was added. (G and H)  
537 Optimal concentrations of L-methionine (for IMCC25003) and L-cysteine (for IMCC26103). Various  
538 concentrations (0–10,000 nM) of L-methionine or L-cysteine were added to the basal medium FAMV.

539
